# Supplementary material for: Exosomal sorting of the viral oncoprotein LMP1 is restrained by TRAF2 association at signalling endosomes
Source: PubMed Central journal article supplement — J Extracell Vesicles. 2015 Apr 10;4:10.3402/jev.v4.26334. doi: 10.3402/jev.v4.26334 (PMC4394166; doi:10.3402/jev.v4.26334), 2015-04-10

Supplemental Figure 1 – TRAF2 recruitment of plasma membrane localized LMP1 is unaffected compared to endosomal LMP1

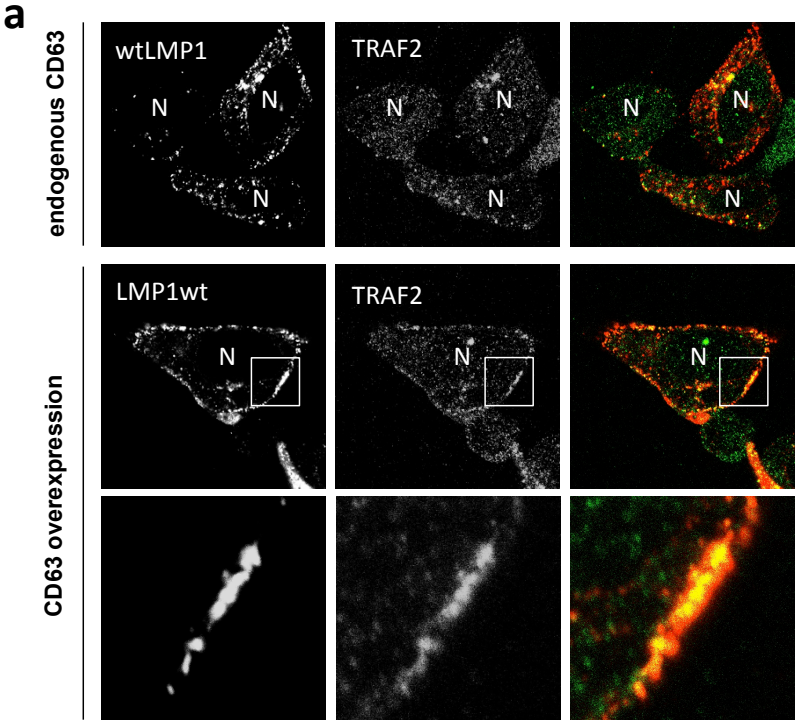

Supplemental Figure 2 – Lack of palmitoylation retains oncogenic SFKs at early-endosomal Rab5+ structures

**a**

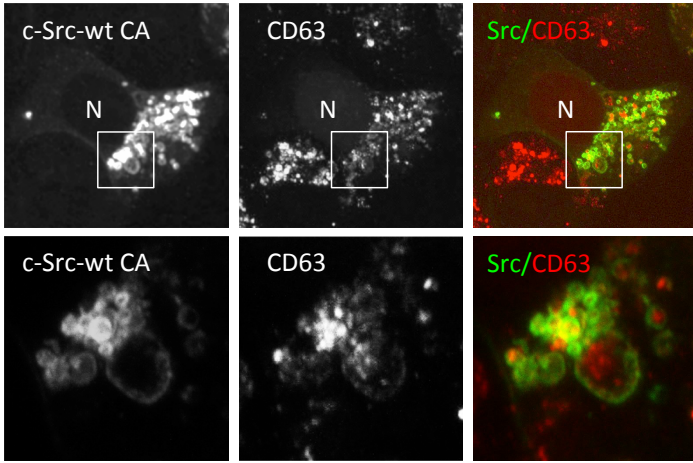

**b**

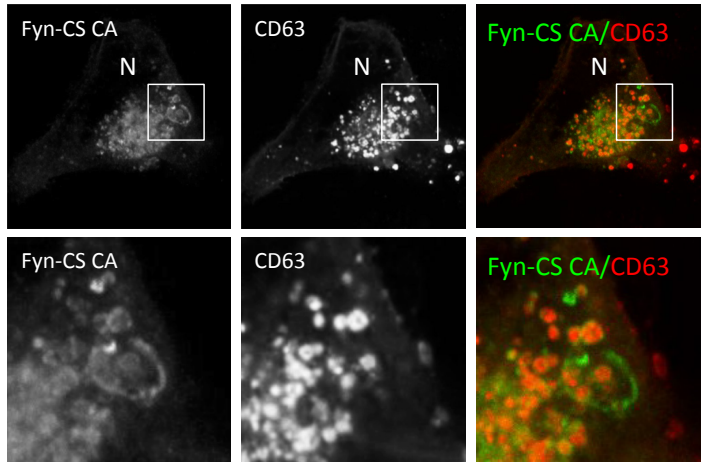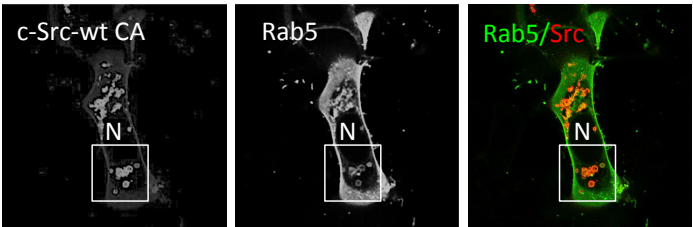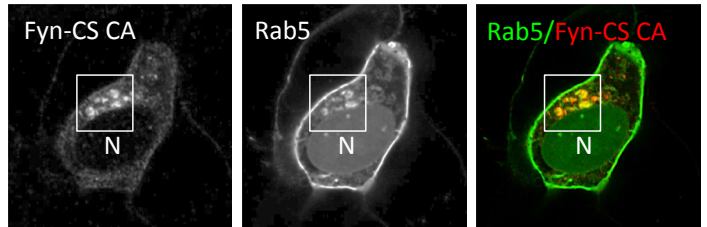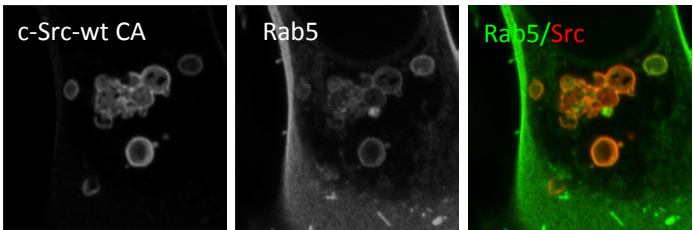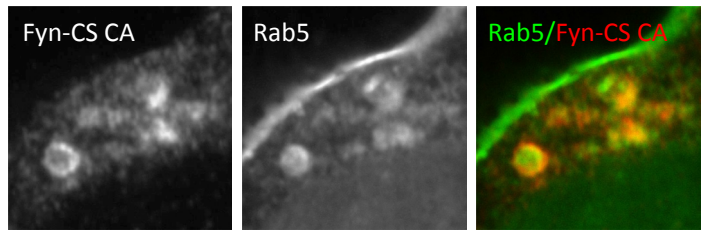

Supplement: JEV-4-26334-s001.pdf [file JEV-4-26334-s001.pdf]
